# Supplementary material for: Multi-scale mean field learning for adaptive decision making in multi-agent systems
Source: PeerJ journal article supplement (doi:10.7717/peerj-cs.3222), 2025-10-02
Supplement: dataStaffSLW.zip [file doors.xlsx]

## Sheet: 1_door
x1	y1
-209750	31606
-195725	41658
-177275	41658
-156175	41658
-145725	52633
-145725	66369
-145725	56529
-145725	76144
-145725	90306
-140825	99756
-133425	72650
-97900	44831
-97900	66369
-97900	88206
-97900	100806
-140825	99756
-133425	72650
-110200	118300
-95429	126700
-88673	126700
-85500	39102
-85500	56476
-85500	78193
-85500	100890
-85500	117050
-85500	123700
-85500	107150
-85500	113700
-194800	24206
-177275	24206
-156175	25206
-120025	32900
-91300	24300
-36759	30351
113000	115400
-36759	41125
-36759	63763
115000	115400
114750	115000
-22299	71750
-36759	99350
-36759	112088
126300	106126
-36759	75407
128650	115000
-36759	80469
130350	115000
143000	109750
-133025	127770
147850	103700
154100	107877
143000	116224
-88673	126700
121951	111932
-135850	47964
149000	117200
150000	117200
-128393	40000
148500	115400
150000	115400
153000	115400
167050	115000
168750	115000
-127593	40000
182177	109250
-92850	104100
163000	23204
-131125	30556
170200	25800
-131125	31541
22349	71800
78000	27000
78000	23800
-162501	23950
-172000	25750
90800	39130
-166634	25750
-172750	21672
92800	40820
92800	42325
-78100	31840
97100	63175
-78100	38400
89100	88960
-74400	47143
90800	39130
-67143	60200
169470	25800
-67143	54024
73800	116900
-67143	31885
75440	27000
75440	23800
-67143	33309
114750	109550
184050	104150
-52919	124500
36725	-137984
-43382	124500
36725	-133319
36725	-112535
36725	-109552
36725	-103274
36725	-101773
36725	-77280
36725	-72324
36725	-65699
36725	-60537
-78100	47807
36725	-41249
-78100	75820
-78100	80429
47451	-146080
50500	-146080
51872	-146080
78293	-141036
74400	-138900
78293	-121650
-78100	87850
78293	-113578
-78100	90227
78293	-91131
-78100	95844
78293	-89782
-78100	99650
78293	-86850
-78100	123654
78293	-79150
-73800	116900
78293	-77400
-116100	123650
78293	-66515
78293	-55700
78293	-40950
78293	-31150
78293	-27019
78293	-23784
81974	-20650
85807	-145200
85807	-139300
85807	-112300
85807	-107800
85807	-100107
-134300	72650
85807	-76607
-127816	24300
-120169	24300
85807	-54994
-126945	40000
-124025	40300
85807	-38194
-116125	37895
74400	-138900
-108450	24300
-131700	61800
66207	-106625
-131700	57300
66207	-99387
-100277	109474
66207	-79234
-98300	111400
66207	-61600
-73800	116900
74300	-47331
-73750	90885
75550	-44000
-74300	121817
87800	-134500
-54331	124500
88300	-127500
110400	-140715
-44627	124500
110400	-136154
115900	-145650
100168	-135989
98300	-108000
98300	-100107
98300	-88357
98300	-64857
98300	-44794
92000	-103900
-78120	27029
91252	-24554
-75402	27029
109950	-24554
-78120	26947
102450	-26102
-75402	26947
-98286	111400
113850	-27650
-109908	24300
-78120	23767
111000	-33224
116100	-37600
121910	-38700
123357	-38700
119977	-33224
127034	-40200
128416	-40200
130600	-40906
130600	-91450
138578	-121650
145677	-110194
-75402	23767
145677	-98132
-98309	111100
145677	-88357
81974	20850
145677	-74632
145677	-64857
145677	-50994
156127	-41694
177227	-41694
91275	20850
195677	-41694
36959	23563
131207	-29544
36959	38537
156127	-24300
36959	38537
166596	-24300
36959	43705
171953	-24300
36959	29705
177227	-24300
36959	50425
194752	-24300
210425	-31594
36959	55375
215350	-34500
36959	63763
36959	75406
36959	80469
162500	-22550
36959	100140
36959	112088
115900	-145650
116601	25800
74400	-157900
177202	24500
94900	-149100
66207	80815
66207	32305
78000	41100
78000	31400
78000	38700
78000	41100
78000	48650
78000	75299
78000	85850
78000	89600
78000	95350
78000	99650
78000	123200
74300	46800
88650	126200
88650	126200
86300	37059
86300	47100
86300	49510
86300	61200
90950	84300
97100	63700
88400	53750
87923	36500
91823	45900
94285	47702
112000	110077
110977	115400
116100	107877
106850	103700
-40150	-153200
-40150	-154700
-58100	-154350
-58100	-152450
40100	-154700
40100	-153200
58100	-152450
58100	-154350
-114150	-158000
-114150	-153199
-114150	-152799
114150	-157700
114150	-152899
114150	-152800
52900	124500
54300	124500
59600	124500
75350	124500
77900	128550
77900	136550
77900	127000
52750	139600
62650	139600
38700	137800
37073	132200
37073	135600
35450	138700
62650	134800
-78300	133350
-55150	140060
-52900	124500
-37120	126700
-47975	140060
-73000	134400
-71660	134400
-62300	134400
-52700	134920
-46950	136475
-46950	139000
-58100	133350
-73580	132400
-72300	132400
-64700	132400
-63400	132400
-75430	126700
-50800	132200
-48900	131856
-55350	132400
-59400	131600
-78300	-91800
-78300	-30900
-83203	-21110
-78300	-26740
-78300	-31100
-78300	-40450
-78300	-44450
-78300	-55700
-78300	-63100
-78300	-66100
-78300	-77400
-78300	-86600
-78300	-113100
-78300	-121650
-78300	-141026
-36960	-41249
-36960	-60537
-36960	-65699
-36960	-83999
-36960	-89204
-36960	-99224
-36960	-111000
-36960	-135662
-89400	-93400
-91250	-83685
-89400	-104750
-89400	-115300
-89400	-126300
-89400	-126300
-101601	-25300
-109320	-25300
-119751	-25300
-127370	-25300
-169150	-126000
-172000	-134770
-106850	-81400
-111350	-125000
-116100	-125600
-114852	-132300
-109325	-137400
-89400	-133900
-96100	-135550
-92851	-148100
-88651	-148100
-74487	-143400
-69200	-148500
-143200	-128750
-143200	-130650
-91000	-38600
-86100	-46450
-88000	-36400
-86100	-38200
-91275	-20870
-95550	-62600
-94500	-63600
-95000	-65700
-177250	-24199
-170900	-26200
-169498	-26200
-157576	-25300
-78300	-23800
-67135	-52720
-67135	-54094
-78300	-89833
-67076	-106635
-67076	-99438
-37750	-153966
-131485	-11584
-78300	-138975
37750	-154014
85807	82023
81986	-149100
88595	-149100
-23592	-81550
-21419	-81550
21420	-81450
23597	-81450
-34450	137628
