# Supplementary material for: Multi-scale mean field learning for adaptive decision making in multi-agent systems
Source: PeerJ journal article supplement (doi:10.7717/peerj-cs.3222), 2025-10-02
Supplement: dataStaffSLW.zip [file exits.xlsx]

## Sheet: 1_exit
x1	y1	x2	y2
-225900	-146201	-225900	-139387
-225900	-47000	-225900	-39056
-225900	-23021	-225900	-18704
-225900	17900	-225900	23300
-225900	48530	-225900	56101
-225900	91330	-225900	97396
-225900	109274	-225900	115340
226091	-137777	226091	-131945
226091	-119806	226091	-112912
226091	-96286	226091	-90409
226091	-54388	226091	-48700
226091	38858	226091	46393
226091	115585	226091	124000
-248999	-131789	-248999	-124181
-248999	-35873	-248999	-28247
-248999	28322	-248999	35734
-248999	99178	-248999	107803
249000	-107843	249000	-100148
249000	-35784	249000	-28216
249000	28111	249000	35839
249000	100144	249000	107806
