# Supplementary material for: Multi-scale mean field learning for adaptive decision making in multi-agent systems
Source: PeerJ journal article supplement (doi:10.7717/peerj-cs.3222), 2025-10-02
Supplement: dataStaffSLW.zip [file pillars.xlsx]

## Sheet: 1_pillar
x1	y1	x2	y2
-209550	12450	-206450	15550
-192550	12450	-189450	15550
-173550	12450	-170450	15550
-154550	12450	-151450	15550
-116550	12450	-113450	15550
-97550	12450	-94450	15550
-78550	12450	-75450	15550
-59550	12450	-56450	15550
-40550	12450	-37450	15550
-135550	12450	-130050	15550
-209550	-15550	-206450	-12450
-192550	-15550	-189450	-12450
-173550	-15550	-170450	-12450
-154550	-15550	-151450	-12450
-116550	-15550	-113450	-12450
-97550	-15550	-94450	-12450
-78550	-15550	-75450	-12450
-59550	-15550	-56450	-12450
-40550	-15550	-37450	-12450
-135550	-15550	-130050	-12450
206450	-15550	209550	-12450
189450	-15550	192550	-12450
170450	-15550	173550	-12450
151450	-15550	154550	-12450
113450	-15550	116550	-12450
94450	-15550	97550	-12450
75450	-15550	78550	-12450
56450	-15550	59550	-12450
37450	-15550	40550	-12450
130050	-15550	135550	-12450
206450	12450	209550	15550
189450	12450	192550	15550
170450	12450	173550	15550
151450	12450	154550	15550
113450	12450	116550	15550
94450	12450	97550	15550
75450	12450	78550	15550
56450	12450	59550	15550
37450	12450	40550	15550
130050	12450	135550	15550
-16656	12345	-13344	15656
-16656	34345	-13344	37656
-16656	57845	-13344	61156
-16656	81345	-13344	84656
-16656	103345	-13344	106656
-16656	123950	-13344	127250
13344	12345	16656	15656
13344	34345	16656	37656
13344	57845	16656	61156
13344	81345	16656	84656
13344	103345	16656	106656
13344	123950	16656	127250
13344	-15656	16656	-12345
13344	-37656	16656	-34345
13344	-61156	16656	-57845
13344	-84656	16656	-81345
13344	-106656	16656	-103345
13344	-127250	16656	-123950
-16656	-15656	-13344	-12345
-16656	-37656	-13344	-34345
-16656	-61156	-13344	-57845
-16656	-84656	-13344	-81345
-16656	-106656	-13344	-103345
-16656	-127250	-13344	-123950
-16656	-149255	-13344	-145944
13344	-149255	16656	-145944
-59300	-128300	-56700	-125700
-40300	-128300	-37700	-125700
-59300	-106300	-56700	-103700
-40300	-106300	-37700	-103700
-59300	-82800	-56700	-80200
-40300	-82800	-37700	-80200
-59300	-59300	-56700	-56700
-40300	-59300	-37700	-56700
-59300	-37300	-56700	-34700
-40300	-37300	-37700	-34700
-59300	34700	-56700	37300
-40300	34700	-37700	37300
-59300	58200	-56700	60800
-40300	58200	-37700	60800
-59300	81700	-56700	84300
-40300	81700	-37647	84300
-59300	103700	-56688	106300
-40300	103700	-37686	106300
37700	-128300	40300	-125700
56700	-128300	59300	-125700
37700	-106300	40300	-103700
56700	-106300	59300	-103700
37700	-82800	40300	-80200
56700	-82800	59300	-80200
37700	-59300	40300	-56700
56700	-59300	59300	-56700
37700	-37300	40300	-34700
56700	-37300	59300	-34700
37700	34700	40300	37300
56700	34700	59300	37300
37700	58200	40300	60800
56700	58200	59300	60800
37700	81700	40300	84300
56700	81700	59300	84300
37700	103700	40300	106300
56700	103700	59300	106300
-217243	24295	-215812	25739
-217205	35285	-215782	36668
-200200	24300	-198800	25750
-191700	24300	-190300	25750
-182225	24406	-180800	25750
-200200	35300	-198800	36700
-182200	35300	-180800	36700
-163200	35300	-161800	36700
-144200	35300	-142800	36700
-199993	40613	-199005	41585
-191495	40604	-190513	41578
-181984	40629	-181012	41575
-172456	40642	-171511	41561
-162978	40642	-162032	41522
-153459	40573	-152521	41554
-143943	47270	-143041	48206
-143950	59080	-143047	59933
-143934	70810	-142987	71765
-143920	82552	-143098	83449
-143910	93548	-143029	94446
-134782	34930	-133189	37054
-134534	47214	-133543	48240
-134742	58450	-133149	60610
-134494	70711	-133500	71750
-134716	81984	-133284	84016
-134500	93500	-133500	94500
-209088	34903	-206958	37034
-192034	34939	-189938	37034
-173139	34939	-170866	37034
-154017	34869	-151993	37106
-208503	24545	-207524	25458
-172537	24475	-171509	25481
-163000	24523	-162029	25452
-124993	35503	-123995	36492
-116065	34903	-113948	37064
-105977	35473	-104999	36466
-153511	24553	-152500	25446
-144015	24509	-143004	25491
-134504	24509	-133508	25461
-132124	24465	-131128	25476
-125006	24479	-123965	25476
-115495	24509	-114558	25476
-106011	24479	-104985	25476
-96485	24495	-95533	25462
-209053	58372	-206902	60408
-192178	58449	-189950	60485
-173154	58295	-171003	60485
-154048	58449	-151936	60408
-154009	81930	-151973	84004
-173112	81663	-170922	83814
-191913	81588	-189877	83815
-209021	81128	-206870	83279
-209081	102829	-206932	104906
-199768	100113	-199201	100671
-199816	103847	-199211	104443
-192104	103291	-189901	105503
-191291	100086	-190686	100700
-181843	104245	-181135	104923
-181818	100081	-181178	100714
-173121	103670	-170853	105957
-172330	100046	-171663	100723
-162852	104469	-162156	105126
-162852	100057	-162184	100714
-154176	103582	-151884	105996
-153396	100047	-152591	100803
-143834	104571	-143109	105267
-134847	103810	-133126	106143
-116167	58384	-113798	60677
-116144	81873	-113855	84178
-116130	103820	-113822	106143
-87001	28907	-85987	29901
-87005	35520	-86008	36477
-97110	34917	-94913	37063
-87027	42157	-85963	43231
-96548	47222	-95473	48291
-87059	51351	-85970	52421
-97140	58362	-94870	60602
-87086	58908	-85956	60079
-87032	65947	-85974	67057
-96534	70719	-95466	71783
-87073	73710	-85958	74907
-97112	81872	-94865	84185
-87099	82384	-85959	83557
-87060	88732	-85961	89831
-96545	93430	-95425	94550
-87050	97851	-85981	98929
-97129	103875	-94905	106119
-87044	104458	-85963	105549
-96520	114377	-95489	115427
-87009	114380	-85988	115413
-87053	20814	-85963	21892
-77603	20814	-76467	21868
-68078	20738	-66953	21957
-77601	28819	-76472	29900
-68033	28913	-67022	29900
-78130	34850	-75968	37106
-67994	35485	-67030	36495
-77505	42198	-76506	43209
-68005	42199	-67018	43174
-77526	51374	-76510	52428
-68000	51431	-67040	52390
-78091	58370	-75924	60559
-68019	58994	-67054	59971
-77452	65973	-76568	67010
-67996	65972	-67018	66986
-77534	76944	-76479	77879
-77515	114384	-76496	115391
-67950	114446	-67003	115375
-78137	103910	-75893	106063
-67980	104517	-67040	105456
-77486	97895	-76501	98856
-68022	97919	-66989	98868
-77460	88784	-76510	89734
-67978	88784	-66991	89772
-78106	81824	-75940	84047
-67993	82451	-67005	83515
-67993	77056	-67062	77987
-43153	23814	-39761	27790
-43078	43830	-39775	47783
-43127	67333	-39769	71327
-43180	90744	-39804	94773
-43138	118444	-39644	122472
215792	-25915	217235	-24362
207311	-26491	210808	-24127
198776	-25772	200195	-24267
190240	-25800	191662	-24308
198807	-36694	200229	-35319
180773	-25822	182171	-24348
180801	-36689	182176	-35290
161755	-36662	163234	-35297
207486	-41547	208438	-40642
199034	-41563	199913	-40669
190546	-41578	191456	-40669
181027	-41549	181981	-40684
171555	-41549	172420	-40639
162045	-41581	162943	-40638
152582	-41491	153479	-40624
142709	-36706	144223	-35289
143044	-47500	144029	-46587
133308	-47724	134683	-46365
133482	-25477	134501	-24519
143022	-25476	144011	-24488
152497	-25500	153489	-24498
162000	-25419	163011	-24541
131068	-25592	132057	-24602
113937	-37136	116071	-34951
124031	-36427	125007	-35533
133108	-37159	134842	-34856
130522	-37064	132694	-34923
123955	-25451	125000	-24488
114464	-25588	115509	-24461
104973	-36479	106121	-35508
105061	-25441	106033	-24425
94925	-148702	97089	-146578
85984	-148099	87008	-147074
85999	-137404	86998	-136420
95488	-137396	96495	-136412
86006	-127511	87000	-126510
94947	-128039	97059	-125912
86009	-120895	87002	-119902
95501	-116510	96507	-115492
86000	-111696	86997	-110662
86013	-105450	86998	-104491
94917	-106085	97086	-103942
86045	-97211	87022	-96195
95498	-93780	96494	-92783
113951	-128058	116079	-125978
113884	-106201	116086	-103897
130513	-106122	132673	-103921
133203	-106082	134834	-103900
113911	-148695	116062	-146544
130517	-128104	132718	-125945
133158	-128104	134815	-125966
151900	-128107	154054	-125907
151896	-106096	154012	-103934
151912	-82529	153992	-80449
151833	-59036	154148	-56917
170961	-59139	173051	-56976
143662	-131863	147444	-128649
143243	-127265	143787	-126746
162264	-127213	162709	-126793
152768	-122639	153262	-122144
162216	-122662	162785	-122119
171813	-122711	172209	-122167
181163	-122760	181831	-122118
190686	-122760	191353	-122043
199115	-122760	199832	-122093
37889	-148705	40079	-146547
56926	-148689	59084	-146532
66955	-148133	67968	-147152
75916	-148721	78090	-146547
94937	-82606	97080	-80410
95490	-70331	96615	-69189
94915	-59107	97076	-56946
95326	-47687	96665	-46329
94933	-37069	97041	-34926
113906	-59062	116075	-56894
133214	-59109	134822	-56928
143199	-58315	143819	-57675
189887	-59142	192065	-56898
206870	-59073	209059	-56919
113930	-82591	116086	-80401
133226	-82587	134812	-80424
133470	-70306	134539	-69184
143230	-70031	143784	-69456
143214	-81797	143791	-81214
133488	-93754	134490	-92752
143199	-93548	143792	-92970
143199	-105297	143778	-104712
133474	-116526	134516	-115484
143207	-116300	143789	-115705
170896	-106110	173112	-103894
170928	-82563	173097	-80409
189933	-82610	192107	-80372
206938	-82575	209064	-80421
189978	-106097	192165	-103881
206920	-106066	209094	-103905
224205	-107491	226710	-102499
199188	-127012	199805	-126411
189919	-127768	192113	-125645
181209	-127115	181797	-126541
170936	-128082	173091	-125910
206944	-127774	209100	-125624
85995	-88605	86993	-87598
85999	-81998	87008	-80982
85989	-73202	86983	-72193
85983	-65132	86999	-64116
86006	-58554	86987	-57514
86006	-51933	87034	-50905
85959	-42733	86987	-41764
85993	-36533	86998	-35505
86057	-29856	87002	-28930
95510	-25496	96486	-24505
85944	-21876	87036	-20878
76484	-21864	77482	-20854
66995	-137412	67997	-136383
76503	-137412	77514	-136392
66991	-127510	68005	-126523
75885	-128071	78077	-125899
76492	-120889	77516	-119884
66991	-120905	67996	-119901
67024	-111682	68007	-110690
76498	-111709	77499	-110700
66997	-105502	67989	-104511
75907	-106094	78073	-103938
66989	-97218	68011	-96197
76482	-97228	77495	-96242
66984	-88609	67998	-87601
76486	-88591	77510	-87595
66994	-82021	68001	-81014
75885	-82606	78102	-80391
66985	-76417	67990	-75404
76499	-76381	77485	-75405
67004	-65097	67991	-64119
76521	-65097	77481	-64109
75931	-59087	78054	-56910
67014	-58506	67993	-57519
67022	-51865	67996	-50891
76485	-51895	77474	-50965
67002	-42694	67971	-41677
76508	-42694	77549	-41795
75866	-37086	78082	-34936
66980	-36512	68000	-35529
67017	-29915	67981	-28923
76496	-29878	77479	-28933
66996	-21826	67990	-20833
-217029	-137429	-215985	-136402
-208567	-137446	-207495	-136362
-200059	-137447	-198962	-136375
-191539	-137435	-190481	-136370
-182034	-137436	-180975	-136376
-172520	-137436	-171492	-136391
-163028	-137436	-162000	-136393
-153534	-137414	-152491	-136346
-144042	-137454	-142973	-136361
-134534	-137428	-133483	-136378
-132166	-137434	-131037	-136348
-125104	-137434	-123975	-136348
-115524	-137422	-114495	-136368
-106050	-137450	-104970	-136383
-96633	-137476	-95465	-136362
-87038	-137437	-85987	-136370
-77516	-137421	-76493	-136388
-68014	-137409	-66974	-136366
-217029	-126468	-215989	-125429
-209187	-127389	-206839	-125026
-200008	-126972	-198981	-125910
-192166	-127882	-189828	-125523
-182010	-127301	-180971	-126284
-173127	-128029	-170884	-125794
-163031	-127410	-161990	-126407
-154131	-128045	-151859	-125816
-144031	-127479	-142985	-126424
-134818	-128121	-133192	-125865
-125028	-127521	-123994	-126493
-116109	-128114	-113907	-125921
-106020	-127512	-104995	-126501
-97126	-128145	-94898	-125879
-87061	-127546	-85994	-126464
-78156	-128152	-75862	-125876
-68022	-127525	-66968	-126452
-217095	-116555	-215988	-115466
-208524	-116515	-207470	-115488
-200041	-116529	-198954	-115462
-191518	-116529	-190484	-115482
-182027	-116516	-180992	-115469
-172521	-116522	-171500	-115469
-163023	-116529	-161996	-115482
-153519	-116510	-152491	-115483
-144020	-116503	-142986	-115476
-134528	-116516	-133494	-115502
-132117	-116509	-131109	-115482
-125011	-116518	-123960	-115485
-132721	-128111	-130458	-125850
-115540	-116513	-114414	-115472
-106035	-116518	-105006	-115479
-96541	-116541	-95497	-115498
-87090	-120944	-85945	-119828
-77557	-120972	-76498	-119856
-68044	-120972	-66927	-119856
-217025	-105152	-215967	-104072
-209180	-105780	-206813	-103437
-200037	-105223	-198979	-104177
-192192	-106008	-189779	-103609
-182046	-105462	-180953	-104370
-173142	-106133	-170866	-103892
-163100	-105619	-161935	-104396
-154155	-106172	-151883	-103844
-144021	-105541	-142962	-104519
-134835	-106148	-133177	-103905
-132728	-106130	-130481	-103873
-125007	-105513	-123966	-104453
-116127	-106116	-113880	-103891
-106015	-105529	-105002	-104495
-97098	-106124	-94896	-103864
-87064	-111749	-85988	-110654
-87063	-105530	-85968	-104510
-77519	-111705	-76480	-110667
-68032	-111687	-66974	-110649
-78148	-106131	-75861	-103894
-68056	-105523	-66984	-104476
-217031	-93763	-215974	-92730
-208534	-93750	-207489	-92730
-199988	-93762	-198979	-92706
-191539	-93799	-190446	-92694
-182044	-93786	-180951	-92706
-172538	-93811	-171480	-92730
-163021	-93795	-161968	-92743
-153504	-93765	-152489	-92721
-144017	-93765	-142987	-92736
-134522	-93750	-133499	-92721
-132106	-93781	-131083	-92751
-125027	-93765	-124005	-92698
-115552	-93802	-114449	-92688
-106022	-93773	-104999	-92732
-96540	-93761	-95472	-92718
-87036	-97260	-86011	-96173
-77518	-97191	-76472	-96145
-68032	-97216	-66986	-96158
-87050	-88647	-85991	-87602
-77542	-88659	-76484	-87575
-68051	-88647	-66980	-87602
-216993	-82037	-215990	-80983
-209156	-82681	-206803	-80342
-200036	-82030	-198990	-80985
-192149	-82652	-189762	-80308
-182025	-82045	-180989	-80961
-173132	-82626	-170895	-80366
-163070	-82032	-161918	-80935
-154154	-82640	-151819	-80359
-144028	-82029	-142996	-80964
-134829	-82662	-133175	-80376
-132736	-82636	-130490	-80364
-125027	-82002	-123998	-80965
-116143	-82643	-113875	-80334
-106010	-82024	-104989	-80987
-97125	-82628	-94900	-80387
-87045	-82035	-85989	-80980
-78117	-82633	-75888	-80380
-68041	-82042	-66987	-80989
-77543	-76407	-76505	-75385
-68037	-76435	-66971	-75371
-87044	-73241	-86008	-72179
-217025	-70272	-215997	-69233
-208522	-70279	-207479	-69236
-200035	-70267	-198981	-69233
-191560	-70259	-190486	-69171
-182022	-70263	-180973	-69232
-172536	-70263	-171471	-69227
-162998	-70243	-161989	-69235
-153542	-70269	-152477	-69262
-144028	-70271	-142976	-69219
-134521	-70266	-133481	-69239
-132104	-70266	-131088	-69227
-125027	-70274	-123979	-69207
-115530	-70296	-114467	-69234
-106022	-70267	-104997	-69224
-96544	-70297	-95480	-69225
-87036	-65128	-85963	-64086
-77525	-65108	-76453	-64095
-68053	-65127	-66981	-64104
-217045	-58550	-216007	-57463
-209177	-59179	-206841	-56825
-200019	-58521	-198951	-57474
-192170	-59209	-189844	-56825
-182033	-58521	-180985	-57483
-173114	-59148	-170879	-56864
-163048	-58540	-162000	-57462
-154090	-59118	-151874	-56884
-144004	-58540	-142966	-57462
-134805	-59138	-133198	-56924
-125059	-58549	-123951	-57462
-116121	-59118	-113875	-56904
-106035	-58519	-105013	-57502
-97102	-59112	-94906	-56917
-87028	-58509	-85978	-57473
-78131	-59129	-75886	-56859
-68023	-58517	-67006	-57489
-217059	-47555	-215983	-46463
-208571	-47555	-207462	-46447
-200009	-47522	-198951	-46480
-191516	-47521	-190474	-46497
-182020	-47521	-180976	-46485
-172524	-47529	-171508	-46480
-163020	-47526	-161982	-46468
-153511	-47532	-152484	-46486
-144031	-47520	-142921	-46498
-134524	-47511	-133461	-46476
-132104	-47511	-131089	-46483
-125014	-47530	-124002	-46478
-115524	-47533	-114463	-46506
-106030	-47522	-104980	-46506
-96519	-47506	-95490	-46491
-87016	-51912	-85984	-50888
-77530	-51932	-76456	-50869
-68034	-51922	-66982	-50870
-87045	-42739	-85994	-41655
-77519	-42717	-76481	-41690
-68050	-42740	-66977	-41714
-217026	-36509	-215978	-35520
-209187	-37160	-206824	-34787
-200044	-36520	-198997	-35461
-192183	-37160	-189821	-34810
-182021	-36521	-180991	-35479
-173120	-37128	-170868	-34889
-163050	-36531	-161977	-35474
-154132	-37137	-151877	-34876
-144023	-36515	-142979	-35483
-134848	-37139	-133174	-34867
-132730	-37126	-130412	-34846
-125004	-36526	-123959	-35494
-116134	-37133	-113851	-34897
-106005	-36504	-104991	-35483
-97139	-37128	-94884	-34883
-87009	-36532	-85986	-35478
-78123	-37072	-75858	-34856
-68049	-36508	-66974	-35498
-87014	-29917	-85988	-28879
-77547	-29943	-76495	-28905
-68041	-29954	-66964	-28865
-217058	-25510	-216010	-24437
-208531	-25511	-207471	-24477
-200069	-25498	-198970	-24464
-191516	-25523	-190455	-24463
-182045	-25524	-180959	-24516
-172561	-25551	-171449	-24478
-163038	-25549	-161952	-24502
-153542	-25562	-152507	-24451
-144025	-25510	-142980	-24465
-134526	-25519	-133481	-24474
-132109	-25536	-131088	-24475
-125013	-25504	-123975	-24499
-115529	-25529	-114467	-24492
-106007	-25504	-104969	-24483
-96530	-25524	-95483	-24487
-87067	-21867	-85975	-20763
-77576	-21904	-76457	-20787
-68020	-21859	-66975	-20815
66965	20843	68010	21878
76457	20781	77556	21895
85984	20826	87007	21848
95450	24438	96520	25492
104970	24453	106015	25499
114473	24456	115545	25536
123966	24493	124992	25536
131073	24464	132107	25535
133468	24473	134540	25526
142979	24474	143995	25526
152482	24464	153525	25526
161987	24487	163009	25499
171487	24485	172511	25512
180988	24482	182019	25519
190473	24467	191484	25534
198964	24476	200022	25515
207474	24438	208572	25487
215990	24481	217036	25526
66942	28863	68013	29901
76461	28879	77502	29890
85970	28866	87037	29912
66990	35484	67997	36516
75874	34895	78107	37095
85968	35483	87017	36541
94887	34864	97146	37111
104976	35481	106011	36526
113889	34867	116149	37104
123969	35454	125029	36524
130490	34862	132708	37131
133162	34872	134810	37120
142982	35482	144003	36498
151851	34868	154138	37110
161968	35467	163032	36530
170849	34854	173114	37118
180991	35471	182016	36509
189823	34757	192155	37158
198965	35464	200023	36557
206840	34838	209199	37124
215983	35475	217009	36545
66981	42191	68002	43245
76502	42193	77534	43224
86000	42149	87032	43181
66990	51364	67996	52420
76474	51331	77505	52434
85955	51349	87059	52379
95462	47195	96536	48304
104952	47218	106011	48264
114465	47240	115547	48322
123942	47240	125013	48287
131079	47217	132138	48275
133465	47206	134512	48264
142976	47250	144012	48285
152500	47226	153547	48296
161943	47251	163025	48310
171397	47251	172526	48263
180943	47228	182037	48275
190444	47159	191503	48299
198979	47219	200050	48300
207444	47217	208520	48263
215956	47232	217032	48277
66913	58923	68046	60093
75886	58337	78076	60582
85994	58978	87051	60016
94891	58335	97138	60637
104960	58883	106055	60052
113815	58335	116119	60637
123942	58941	125151	60073
130481	58356	132728	60639
133143	58394	134843	60620
142989	58966	144206	60019
151859	58386	154133	60623
161996	58975	163061	60028
170861	58354	173136	60627
180982	58917	182036	60029
189876	58364	192128	60602
198943	59005	200057	60058
206866	58374	209107	60589
215975	58985	217009	60033
66972	65966	68036	67014
76460	66019	77513	67032
85987	65980	87018	67026
86007	73770	87029	74832
95488	70712	96535	71767
104972	70722	106180	71763
114486	70748	115515	71802
123947	70748	125078	71815
131081	70735	132123	71777
133420	70748	134526	71789
142944	70671	144063	71827
152469	70722	153550	71764
161995	70734	163075	71788
171455	70696	172535	71776
180983	70725	182047	71748
190480	70732	191504	71785
198972	70732	200012	71760
207461	70741	208578	71784
215975	70734	217035	71744
66964	76959	67996	78029
76472	76944	77517	78031
66983	82481	68012	83489
75882	81872	78106	84135
85933	82478	87064	83526
94854	81857	97159	84092
104949	82437	106081	83499
113871	81844	116135	84078
123953	82464	125140	83526
130472	81885	132722	84105
133164	81857	134862	84078
142940	82312	144058	83429
151808	81651	154127	83941
161944	82244	163007	83320
170880	81651	173144	83899
180961	82093	182010	83196
189883	81334	192119	83638
198929	81649	200033	82752
206869	80779	209119	83041
215971	81027	217061	82117
66949	88707	68082	89839
76438	88751	77548	89883
85969	88750	87035	89793
95455	93496	96505	94559
104924	93497	106044	94505
114465	93470	115557	94534
123962	93428	124998	94533
131079	93498	132115	94519
133459	93498	134495	94463
142942	93498	144049	94520
152399	93469	153464	94476
161994	93469	163044	94505
171477	93442	172486	94547
180961	93456	182025	94449
190432	93455	191538	94519
198935	93455	200013	94533
207452	93524	208712	94532
215983	93413	217019	94546
66936	97791	68042	99033
76487	97903	77517	98932
85961	97846	87021	98933
66975	104466	68026	105543
75854	103877	78104	106108
85991	104482	87017	105544
94818	103859	97158	106150
104994	104472	106047	105524
113861	103850	116122	106101
124000	104480	125014	105516
130486	103898	132713	106161
133159	103841	134827	106123
142952	104355	144001	105412
151809	103563	154151	105951
161987	104172	163231	105366
170821	103514	173187	105854
180998	104051	181998	105221
189810	103441	192151	105708
198987	103807	200060	104928
206865	102983	209147	105215
215984	103217	217006	104267
66970	114369	68033	115421
76472	114350	77545	115461
85947	114379	87000	115402
95487	114375	96498	115423
104966	114374	106015	115442
114506	114363	115517	115412
121258	110908	122294	111954
123972	114380	125019	115407
131097	114391	132115	115408
133489	114361	134537	115418
142969	114357	144023	115410
152475	114391	153522	115407
161973	114344	163039	115441
171429	114376	172505	115431
180967	114368	182025	115418
190394	114215	191472	115410
198935	114350	200013	115444
207350	114299	208529	115427
215979	114367	217041	115444
-226098	-148690	-223905	-146492
-217017	-148095	-216017	-147107
-209117	-148692	-206905	-146520
-200001	-148096	-199007	-147099
-192108	-148707	-189905	-146506
-192005	-151047	-189996	-149050
-181995	-148101	-181007	-147099
-173095	-148701	-170890	-146501
-173000	-151054	-171007	-149052
-163002	-148103	-161999	-147103
-154101	-148698	-151899	-146500
-153998	-151050	-152008	-149063
-144000	-148101	-143001	-147101
-134794	-148700	-133190	-146507
-135003	-151057	-133003	-149050
-125001	-148098	-124002	-147098
-116105	-148697	-113901	-146502
-106000	-148100	-105000	-147100
-97096	-148702	-94897	-146500
-87009	-148106	-86012	-147106
-78112	-148684	-75905	-146488
-68000	-148099	-66999	-147099
-59106	-148701	-56906	-146500
-132398	-157653	-130788	-156052
-116055	-157893	-113949	-155797
-97020	-157939	-94953	-155800
-78052	-157896	-75955	-155802
-58742	-157605	-57250	-156100
-40032	-157902	-37946	-155807
-40116	-148705	-37898	-146498
-16098	-148703	-13899	-146505
-16057	-157889	-13966	-155824
13896	-148700	16101	-146496
13956	-157891	16047	-155799
37867	-148699	40082	-146505
37947	-157918	40037	-155792
56900	-148702	59099	-146513
57239	-157605	58747	-156107
66990	-148110	67998	-147095
75939	-157897	78050	-155807
75899	-148703	78092	-146516
85994	-148106	87002	-147095
94891	-148705	97090	-146487
94936	-157908	97049	-155804
113908	-148697	116099	-146502
113933	-157893	116051	-155802
130516	-148685	132719	-146501
133197	-148701	134804	-146500
133019	-151046	135017	-149045
130779	-157653	132395	-156049
151897	-148696	154098	-146497
152016	-151056	154015	-149060
170903	-148694	173102	-146515
171024	-151050	173025	-149048
189898	-148697	192101	-146501
190021	-151045	192020	-149046
206900	-148704	209097	-146502
223898	-148697	226095	-146515
-225501	-137402	-224499	-136396
-226707	-128206	-224211	-123215
-226694	-107104	-224201	-102103
-226698	-83999	-224205	-79000
-226707	-60491	-224203	-55498
-226704	-38505	-224202	-33495
-226706	-17915	-224201	-12901
-225602	-12703	-224398	-11101
-225605	11088	-224402	12705
-226705	12900	-224200	17905
-226715	33502	-224193	38504
-226699	56982	-224201	62000
-226707	79218	-224202	84198
-226697	100499	-224199	105503
-226099	124495	-223899	126700
-209136	124468	-206864	126730
-192136	124482	-189886	126729
-192041	126990	-189950	129048
-173155	124466	-170842	126685
-173058	127066	-170959	129115
-154165	124406	-151860	126710
-154071	126978	-151985	129062
-134869	124441	-133186	126737
-132777	124457	-130449	126768
-135058	127022	-132981	129082
-97179	124435	-94859	126723
-116093	124509	-113839	126742
-105809	134807	-104778	135857
-96506	134766	-95475	135867
-87024	134777	-85953	135827
-77521	134748	-76490	135818
-68047	134757	-66986	135798
-58525	134758	-57474	135818
-49022	134768	-47991	135829
-39537	134778	-38496	135828
-87045	125044	-85994	126135
-78127	124479	-75873	126701
-68027	125055	-66976	126125
-59110	124489	-56836	126782
-48909	125035	-48060	126287
-40113	124489	-37890	126732
-132402	143270	-130800	144923
-132402	151302	-130831	152904
-115768	151286	-114235	152872
-116157	143058	-113903	145285
-105862	143535	-104748	144701
-106207	151699	-104748	152680
-96807	151318	-95226	152867
-97326	142802	-94680	145384
-87259	151686	-85773	152703
-77727	151753	-76275	152687
-78345	142773	-75642	145425
-68286	151659	-66765	152699
-58750	151727	-57284	152669
-59097	142795	-56881	144926
-49228	143634	-47745	144560
-49211	151716	-47748	152758
-40340	142786	-37687	145385
-16127	142965	-13885	145172
13929	143032	16103	145171
37632	142771	40352	145382
38448	134771	39563	135805
37910	124493	40151	126722
48093	125005	48925	126264
56859	124471	59094	126774
66964	125050	68022	126125
75824	124420	78145	126757
85914	125034	87006	126159
94859	124437	97128	126637
105016	125034	106006	126177
113844	124402	116182	126807
123949	124965	125041	126227
130438	124368	132725	126671
133015	127029	135114	129042
133152	124385	134875	126688
142934	125067	144043	126073
151876	124419	154162	126688
152029	127046	154162	129161
161985	125051	163060	126142
170812	124368	173167	126705
171017	127012	173116	129110
181004	125016	182011	126142
189881	124522	192100	126756
190001	127012	192134	129110
198946	124983	200056	126108
206779	124471	209168	126808
215932	125068	217008	126125
223833	124419	226154	126705
47897	134721	49019	135816
57452	134748	58520	135788
66898	134748	67993	135952
76426	134694	77576	135870
47691	143616	49269	144610
47723	151680	49268	152673
57217	151790	58845	152838
56939	142785	59050	144992
66685	151695	68318	152718
75604	142752	78345	145437
76213	151723	77763	152775
85971	134748	87065	135842
95508	134765	96568	135807
94710	142792	97367	145465
85730	151650	87206	152692
95195	151251	96740	152848
104752	151685	106246	152726
104752	143572	105777	144648
104735	134764	105881	135771
113965	143069	116087	145173
114156	151319	115774	152919
130758	151284	132376	152918
130758	143226	132515	145034
224141	-128599	226732	-123587
224142	-107562	226733	-102487
224199	-84023	226743	-78949
224088	-60520	226808	-55391
224073	-38498	226717	-33408
224101	-17923	226802	-12946
224213	-12777	225676	-11033
224361	11105	225599	12684
224184	12861	226737	17932
224490	24480	225532	25522
224180	33476	226696	38552
224448	47234	225480	48311
224182	56977	226725	62027
224454	70747	225556	71794
224164	78684	226726	83728
224420	93450	225534	94519
224153	100862	226715	105940
224434	114380	225485	115377
