# Supplementary material for: Multi-scale mean field learning for adaptive decision making in multi-agent systems
Source: PeerJ journal article supplement (doi:10.7717/peerj-cs.3222), 2025-10-02
Supplement: dataStaffSLW.zip [file walls.xlsx]

## Sheet: 1_wall
x1	y1	x2	y2
-162600	-26200	-162600	-21149
64000	90850	78000	90850
-162427	-25300	-152009	-25300
66207	76190	66207	90850
-152009	-25300	-134961	-25300
64000	76190	74400	76190
-151009	-25300	-151009	-20750
74400	67500	74400	76190
-151009	-20750	-134961	-20750
64000	67500	78000	67500
66207	62050	66207	67500
66207	62050	67800	62050
-134961	-25500	-134961	-20749
66207	49600	66207	53000
-134960	-25300	-97150	-25300
66207	54850	66207	60200
66207	60200	68000	60200
64000	49600	78000	49600
74300	43950	74300	49600
64000	43950	78000	43950
-181800	-132500	-181800	-24199
66207	27600	66207	43950
-173000	-135070	-173000	-126000
66207	40350	78000	40350
-173000	-126000	-162200	-126000
66207	32450	78000	32450
-162200	-132300	-162200	-126000
64000	27600	78000	27600
-170900	-132300	-162200	-132300
71320	20750	71320	27600
-172900	-127800	-170900	-127800
71320	24725	78000	24725
-170900	-135070	-170900	-127800
78000	20750	78000	115600
-172900	-134770	-171100	-134770
75440	20750	75440	27600
-154100	-139200	-154100	-124300
78000	118650	78000	126730
-154100	-125500	-153500	-125500
73800	115600	78000	115600
-153500	-125500	-153500	-124500
73800	115600	73800	118650
66207	82600	78000	82600
-154100	-124300	-143027	-124300
-148900	-124300	-148900	-46900
86300	126200	94700	126200
86300	20850	86300	126200
-148900	-46900	-152009	-46900
-152009	-46900	-152009	-25300
-143200	-128000	-143200	-124500
-152100	-130700	-152100	-127100
91035	115300	91035	126200
-151900	-129600	-143200	-129600
86300	115300	95500	115300
-145000	-130699	-145000	-129800
94000	115300	94000	117200
-153900	-130700	-145000	-130700
94000	117200	95900	117200
95900	117200	95900	124200
-152975	-136400	-152975	-130900
-151488	-136100	-151488	-132799
95900	124200	111875	124200
111875	124200	111875	127770
-152500	-137200	-151350	-137200
96000	126600	111875	126600
-154100	-139200	-151350	-139200
-150200	-139200	-150200	-130900
104200	124200	104200	126600
-149700	-137200	-148550	-137200
86300	89800	89100	89800
-147250	-137299	-147250	-130899
-147250	-137399	-143200	-137399
89100	84300	89100	89800
-145650	-139000	-145650	-137399
86000	84300	97100	84300
86000	62400	97100	62400
-148350	-139000	-143200	-139000
97100	62400	97100	84300
-143200	-139000	-143200	-129800
95500	67150	95500	84300
95500	67150	97100	67150
-144500	-133399	-143200	-133399
-135665	-132299	-123700	-132299
90151	50700	90151	51950
-126950	-128125	-124000	-128125
86000	50700	90151	50700
-126950	-128125	-126950	-126500
91901	50700	91901	51900
-126950	-126500	-124000	-126500
91901	50700	97100	50700
-124000	-128125	-124000	-126500
96000	50700	96000	60000
-114200	-34900	-111900	-34900
97100	50700	97100	60000
-111900	-37100	-111900	-34900
86000	55000	86800	55000
-114200	-37100	-111900	-37100
86000	60000	97100	60000
-110300	-69950	-110300	-47100
86000	48250	97100	48250
-114500	-47100	-110300	-47100
90800	38300	90800	48250
-110300	-81400	-106000	-81400
88400	52300	88400	56100
-110300	-125000	-110300	-47100
88400	56100	90800	56100
-110300	-124300	-105000	-124300
94200	55900	96000	55900
-105000	-137400	-105000	-124300
96000	53450	96000	55900
-115900	-124500	-113100	-124500
95100	53450	96000	53450
-112900	-125000	-110550	-125000
95100	53450	95100	55900
-115900	-126100	-112900	-126100
86000	32343	96000	32343
-112900	-126100	-112900	-124300
86000	36500	87250	36500
-116100	-130700	-116100	-124300
88200	36500	96000	36500
91000	45900	97100	45900
-116100	-128100	-115500	-128100
-115500	-129100	-115500	-128100
92800	41450	97100	41450
95500	45900	95500	48250
-116100	-129100	-115500	-129100
-116100	-130700	-105200	-130700
97100	36500	97100	48250
-114750	-136400	-114750	-132300
92800	36500	92800	45900
-116100	-132300	-114750	-132300
94285	45900	94285	48250
-116100	-137400	-116100	-132300
86000	38300	91000	38300
-116100	-137400	-113400	-137400
86000	44850	91000	44850
-112000	-137400	-112000	-130700
105000	103700	116100	103700
-111800	-137400	-105000	-137400
116100	103700	116100	108900
-107800	-137200	-107800	-130900
105000	108900	116100	108900
-94900	-148100	-86200	-148100
105000	103700	105000	115400
-96100	-146500	-96100	-133900
105000	115400	116100	115400
-96100	-133900	-86200	-133900
112000	108900	112000	115400
-96100	-137200	-86200	-137200
105000	111001	107200	111001
-93800	-137200	-93800	-134200
-91027	-148300	-91027	-137400
107200	108900	107200	111001
110300	93650	110300	103700
-86100	-148300	-86100	-21110
-89400	-133900	-89400	-85600
116100	110300	116100	115400
-89400	-120300	-86200	-120300
114750	110300	116100	110300
114750	108900	114750	115400
-89400	-104800	-86200	-104800
124000	104500	126950	104500
-89400	-96600	-86200	-96600
126950	104500	126950	106126
-89400	-85400	-86200	-85400
124000	104500	124000	106126
-89400	-85400	-89400	-83685
124000	106126	126950	106126
-93100	-83685	-89400	-83685
-93100	-85600	-93100	-83685
125000	115000	133500	115000
-96900	-85600	-93100	-85600
143000	103700	154100	103700
-96900	-85600	-96900	-65700
154100	103700	154100	117200
-96900	-65700	-86200	-65700
143000	103700	143000	117200
-94500	-65500	-94500	-62600
143000	117200	154100	117200
118153	111932	122901	111932
122901	104704	122901	111932
-97100	-62600	-88000	-62600
-88000	-65500	-88000	-62600
-97100	-62600	-97100	-49400
-96900	-49450	-86200	-49450
-96900	-45300	-91000	-45300
-92850	-45100	-92850	-36500
-96900	-40900	-92850	-40900
-96900	-36500	-86200	-36500
-91000	-38300	-86200	-38300
-91000	-38300	-91000	-47300
-90800	-44000	-86200	-44000
-96900	-31700	-86200	-31700
-97000	-20870	-86200	-20870
-97000	-47500	-97000	-20870
-97000	-47500	-86100	-47500
118153	105231	122901	105231
-97000	-58300	-86100	-58300
118801	105431	118801	111731
151900	103900	151900	108700
-86100	-21110	-36960	-21110
145850	115400	145850	117000
-78300	-148900	-78300	-21136
-71344	-27772	-71344	-21110
-78300	-24577	-71495	-24577
-78300	-27960	-64100	-27960
-67230	-43920	-67230	-27960
-78300	-43920	-64100	-43920
143200	115400	154100	115400
150000	108700	150000	117200
-74518	-49964	-74518	-43876
-74518	-49964	-64100	-49964
143200	108700	154100	108700
-72595	-56878	-72595	-49976
147200	108700	147200	115400
151487	110800	151487	114100
152975	108700	152975	115400
-78300	-56900	-67230	-56900
154100	115000	181000	115000
-72421	-53514	-67209	-53514
181000	104150	187200	104150
-67135	-65913	-67135	-49827
187200	93800	187200	109250
-78300	-65913	-64100	-65913
181000	104150	181000	115000
181000	109250	187200	109250
-74383	-75022	-74383	-65885
-78077	-89221	-64100	-89221
-67251	-89221	-67251	-75052
-78300	-75052	-64100	-75052
-74305	-95207	-74305	-89309
-78300	-90425	-74479	-90425
183000	104150	183000	109250
183000	108050	187200	108050
-78300	-95276	-64100	-95276
148900	93800	148900	103700
-67076	-112871	-67076	-95276
-78076	-112871	-64100	-112871
-77882	-112855	-74555	-112855
-74555	-118919	-74555	-112855
110301	93800	110301	103700
106000	25800	106000	59395
106000	59395	110300	59395
-78300	-118919	-64100	-118919
110300	59395	110300	103700
-67193	-140303	-67193	-118919
144000	47650	148900	47650
-78300	-140303	-64100	-140303
148900	47650	148900	103700
-74487	-146326	-74487	-140387
144000	25800	144000	47650
-78300	-148500	-37950	-148500
182000	47650	187200	47650
-77900	-148500	-77900	-146500
187200	47650	187200	103700
-78300	-146500	-37950	-146500
182000	25800	182000	47650
206450	59000	206450	104850
-67400	-148500	-67400	-146500
206450	59000	226700	59000
-57900	-148500	-57900	-146500
206450	104850	226700	104850
-51100	-148500	-51100	-146500
-48100	-148500	-48100	-146500
-36960	-150059	-36960	-20849
-37900	-81550	-19921	-81550
-19921	-117958	-19921	-81550
-37900	-105057	-19921	-105057
226091	59000	226091	115585
-26350	-117958	-19921	-117958
36725	-150049	36725	-20783
20150	-117958	20150	-81483
-26350	-117958	-26350	-105057
20150	-117958	26350	-117958
-225450	-104600	-225450	-58000
-216500	-104600	-216500	-62500
-216500	-62500	-200200	-62500
-224602	13710	-200059	13710
26350	-117958	26350	-105050
-200059	-13318	-200059	13710
20150	-105050	36725	-105050
-224602	-13318	-200059	-13318
-190657	7593	-177653	7593
-177653	-7174	-177653	7593
-190657	-7174	-177653	-7174
-190657	-7174	-190657	7593
-153050	7574	-134167	7574
-134167	-7421	-134167	7574
20150	-81450	36759	-81450
-153050	-7421	-134167	-7421
36959	-146080	78250	-146080
-153050	-7421	-153050	7574
36758	-149100	78293	-149100
-113284	4627	-110019	4627
-110019	-4543	-110019	4627
-113284	-4543	-110019	-4543
-113284	-4543	-113284	4627
-95828	7634	-86732	7634
-86732	-7524	-86732	7634
78293	-149100	78293	-140200
78293	-137600	78293	-20649
-95828	-7524	-86732	-7524
36725	-20650	87600	-20650
-95828	-7524	-95828	7634
85807	-149100	85807	-134500
85807	-127500	85807	-20650
-46674	7697	-30626	7697
48200	-149100	48200	-146080
-30626	-4607	-30626	7697
-46674	-4607	-30626	-4607
-46674	-4607	-46674	7697
-52653	-3731	-52653	3815
51300	-149100	51300	-146080
-52653	-3731	-46674	-3731
67500	-149100	67500	-146080
-52653	3815	-46674	3815
224602	13710	200059	13710
200059	-13318	200059	13710
75900	-149100	75900	-146080
224602	-13318	200059	-13318
74400	-146500	74400	-137712
190657	7593	177653	7593
64000	-140550	78293	-140550
177653	-7174	177653	7593
73900	-137712	78293	-137712
190657	-7174	177653	-7174
66207	-140550	66207	-118599
190657	-7174	190657	7593
64000	-118599	78293	-118599
74300	-118599	74300	-112850
153050	7574	134167	7574
64000	-112850	78293	-112850
134167	-7421	134167	7574
64000	-95099	78293	-95099
153050	-7421	134167	-7421
66207	-112850	66207	-95099
153050	-7421	153050	7574
66207	-103950	78293	-103950
113284	4627	110019	4627
110019	-4543	110019	4627
113284	-4543	110019	-4543
113284	-4543	113284	4627
95828	7634	86732	7634
74500	-90441	78293	-90441
86732	-7524	86732	7634
74500	-95249	74500	-89350
95828	-7524	86732	-7524
64000	-89350	78293	-89350
95828	-7524	95828	7634
46674	7697	30626	7697
66207	-89350	66207	-74749
30626	-4607	30626	7697
46674	-4607	30626	-4607
46674	-4607	46674	7697
52653	-3731	52653	3815
52653	-3731	46674	-3731
66207	-82600	78293	-82600
72500	-82600	72500	-78400
52653	3815	46674	3815
66207	-78400	78293	-78400
64000	-74749	78293	-74749
-85107	-3646	-74515	-3646
74300	-74749	74300	-65850
-74515	-7524	-74515	-3646
64000	-65850	78293	-65850
-85107	-7524	-74515	-7524
66207	-65850	66207	-49599
-85107	-7524	-85107	-3646
67844	-61400	78293	-61400
66207	-57100	76197	-57100
85107	3646	74515	3646
69456	-52050	75427	-52050
74515	7524	74515	3646
85107	7524	74515	7524
64000	-49599	74300	-49599
74300	-49599	74300	-44000
85107	7524	85107	3646
64000	-44000	78293	-44000
-15000	14000	15000	14000
66207	-44000	66207	-27599
64000	-27599	78293	-27599
-15000	-12899	15000	-12899
71320	-27599	71320	-20650
15000	-12899	15000	14000
71320	-24690	78293	-24690
-15000	-12899	-15000	14000
-117250	-160349	-114150	-160349
90947	-149100	90947	-136800
-117250	-160349	-117250	-149900
87000	-137000	90947	-137000
85807	-134500	89700	-134500
-117250	-149900	-114150	-149900
89700	-134500	89700	-127500
-114150	-160349	-114150	-149900
85807	-127500	110400	-127500
-117250	-152899	-114150	-152899
96000	-146200	116000	-146200
-117250	-157700	-114150	-157700
104001	-149100	104001	-146200
-109700	-165950	-96700	-165950
111875	-149100	111875	-146200
-109700	-165950	-109700	-152800
97906	-146200	97906	-136800
-96700	-165950	-96700	-152800
97906	-136800	110400	-136800
-109700	-152800	-96700	-152800
-109700	-152400	-109700	-151400
110400	-146200	110400	-127500
-109700	-152400	-108700	-152400
110400	-141900	115900	-141900
-109700	-151400	-108700	-151400
-108700	-152400	-108700	-151400
115900	-146200	115900	-141900
-106450	-150750	-105750	-150750
100168	-136800	100168	-129584
-106450	-150750	-106450	-150050
98300	-129584	98300	-24300
-105750	-150750	-105750	-150050
85807	-111600	98300	-111600
-106450	-150050	-105750	-150050
85807	-103900	98300	-103900
92600	-111600	92600	-103900
90500	-109600	92600	-109600
113950	-160349	117050	-160349
90500	-109600	90500	-103900
85807	-24554	116100	-24554
113950	-160349	113950	-149900
98300	-41794	130700	-41794
117050	-160349	117050	-149900
113950	-149900	117050	-149900
113950	-152899	117050	-152899
98300	-29300	102450	-29300
113950	-157700	117050	-157700
102450	-29300	102450	-24554
108300	-41794	108300	-27650
112100	-33000	112100	-27650
112100	-28800	113850	-28800
113850	-28800	113850	-27650
114000	-41794	114000	-34850
112050	-34850	116100	-34850
116100	-38700	116100	-24554
113850	-38700	124000	-38700
122500	-41794	122500	-38700
116100	-33224	132700	-33224
124000	-40200	124000	-33224
124000	-40200	132700	-40200
127700	-40200	127700	-33224
132700	-41700	132700	-33224
130600	-127000	130600	-40200
130600	-121650	145677	-121650
145677	-121650	145677	-41694
145677	-41694	210425	-41694
96700	-165950	109700	-165950
123000	-25025	125200	-25025
96700	-165950	96700	-152800
131207	-33000	131207	-24300
109700	-165950	109700	-152800
96700	-152800	109700	-152800
131207	-24300	210425	-24300
108700	-152400	108700	-151400
210425	-41694	210425	-24300
108700	-152400	109700	-152400
136041	-24300	136041	-20000
108700	-151400	109700	-151400
136041	-20000	150959	-20000
109700	-152400	109700	-151400
150959	-24300	150959	-20000
105750	-150750	106450	-150750
162500	-21159	173050	-21159
105750	-150750	105750	-150050
173050	-24300	173050	-21159
106450	-150750	106450	-150050
213500	-36500	213500	-34500
105750	-150050	106450	-150050
213500	-36500	217000	-36500
-96500	-157500	-86596	-157500
213500	-34500	217000	-34500
-96500	-161750	-96500	-157500
217000	-36500	217000	-34500
-59040	-161750	-44250	-161750
165800	-24300	165800	-21159
-86596	-161750	-86596	-157500
169500	-24300	169500	-21159
44250	-161750	96499	-161750
162500	-25300	162500	-21159
96499	-161750	96499	-157500
90947	-149100	104000	-149100
86596	-161750	86596	-157500
98300	-129584	100168	-129584
226091	-149100	226091	-137777
86596	-157500	96499	-157500
-40150	-161750	-40150	-148700
-248999	-149770	-130500	-149770
-58100	-157500	-40150	-157500
-37950	-150059	-31986	-150059
-19932	-150059	-10315	-150059
10315	-150059	19871	-150059
-52400	-161750	-52400	-157500
-58100	-161750	-58100	-148700
27100	-150059	36808	-150059
40100	-157500	40100	-148700
-37750	-157900	-37750	-146300
58100	-161750	58100	-148700
37750	-161750	37750	-146300
-117250	127900	-113950	127900
-117250	127900	-117250	138550
-211050	-21150	-207300	-21150
-113950	127900	-113950	138550
-211050	-26000	-211050	-21150
-117250	138550	-113950	138550
-211050	-26000	-207300	-26000
-117250	136200	-114150	136200
-209950	-26000	-209950	-21150
-117250	131700	-114150	131700
-207300	-26000	-207300	-21150
113951	127900	117251	127900
113951	127900	113951	152950
-207300	-24199	-173050	-24199
-173050	-24199	-173050	-21150
117251	127900	117251	138550
-173050	-26200	-173050	-24199
-173050	-26200	-162600	-26200
113951	138550	117251	138550
113951	136200	117051	136200
-173050	-21150	-162600	-21150
113951	131700	117051	131700
-170300	-26200	-170300	-21150
-166000	-26200	-166000	-21150
-109700	130970	-109700	143800
-109700	130970	-96700	130970
-109700	143800	-96700	143800
-96700	130970	-96700	143800
-109700	129400	-109700	130400
-109700	129400	-108700	129400
-109700	130400	-108700	130400
-108700	129400	-108700	130400
-106450	128050	-106450	128750
-106450	128050	-105750	128050
-106450	128750	-105750	128750
-105750	128050	-105750	128750
-108000	143800	-108000	152950
-108000	152950	-85400	152950
-107200	143800	-107200	149100
-107200	149100	-85400	149100
-85400	149100	-85400	152950
-56950	144750	-56950	152950
-78050	144750	-56950	144750
-78050	144750	-78050	152950
96700	130970	96700	143600
96700	130970	109700	130970
96700	143600	109700	143600
109700	130970	109700	143600
108700	129400	108700	130400
108700	129400	109700	129400
108700	130400	109700	130400
109700	129400	109700	130400
105750	128050	105750	128750
105750	128050	106450	128050
105750	128750	106450	128750
106450	128050	106450	128750
108000	143600	108000	152950
85400	152950	108000	152950
107200	143600	107200	149100
85400	149100	107200	149100
85400	149100	85400	152950
56950	144750	56950	152950
56950	144750	78050	144750
56950	152950	78050	152950
78050	144750	78050	152950
34450	124500	34450	147550
26517	147550	47396	147550
47396	147550	47396	152950
34450	124500	77900	124500
77900	124500	77900	139600
34450	139600	77900	139600
38100	124500	38100	132200
34450	132200	38700	132200
38700	132200	38700	139600
34450	135600	38700	135600
34450	138700	38700	138700
38100	126700	71500	126700
71500	126700	71500	127500
71500	127500	77900	127500
48700	124500	48700	126700
53500	124500	53500	126700
56900	124500	56900	126700
66900	124500	66900	126700
71500	124500	71500	126700
56900	134800	56900	139600
56900	134800	67200	134800
67200	134800	67200	139600
61500	134800	61500	139600
56900	135800	61500	135800
-78300	124500	-34450	124500
-78300	124500	-78300	140060
-34450	124500	-34450	129000
-34450	130900	-34450	135000
-34450	136980	-34450	147007
-78300	140060	-34450	140060
-44100	124500	-44100	140060
-44100	131100	-34450	131100
-39800	131100	-39800	132900
-37700	133000	-37700	140060
-37700	128700	-37700	131100
-38400	128700	-37700	128700
-44100	126700	-34450	126700
-38100	124500	-38100	126700
-35600	129000	-34450	129000
-35600	135000	-34450	135000
-78300	134400	-58100	134400
-72400	134400	-72400	140060
-68000	134400	-68000	140060
-61700	134400	-61700	140060
-58100	132400	-58100	140060
-52700	134400	-52700	140060
-52700	134400	-44100	134400
-49200	134400	-49200	140060
-46950	134400	-46950	140060
-78300	132400	-60200	132400
-78300	126700	-68000	126700
-73000	126700	-73000	132400
-68000	124500	-68000	132400
-64100	124500	-64100	132400
-60200	126700	-60200	132400
-60200	126700	-48900	126700
-57900	126700	-57900	132400
-54500	126700	-54500	132400
-53700	124500	-53700	132400
-60200	131600	-58800	131600
-58800	131600	-58800	132400
-58800	132400	-50800	132400
-50800	130900	-50800	132400
-50800	130900	-48900	130900
-48900	132400	-44100	132400
-57100	124500	-57100	126700
-48900	124500	-48900	132400
-48900	126250	-44100	126250
-54500	130250	-53700	130250
-209750	24206	-209750	41658
-209750	41658	-151832	41658
-145725	43919	-145725	99756
-145725	99756	-133425	99756
-133425	41700	-133425	105000
-133425	41700	-97900	41700
-97900	24206	-97900	111600
-110200	114800	-110200	124700
-110200	114800	-85500	114800
-116100	120000	-110200	120000
-116100	120000	-116100	124500
-116100	124500	-111875	124500
-111875	124500	-111875	126700
-113900	126700	-85500	126700
-85500	20910	-85500	126700
-209750	24206	-173075	24206
-173075	21150	-162501	21150
-162501	21150	-162501	22550
-162501	23950	-162501	25206
-162501	25206	-131125	25206
-131125	25206	-131125	32900
-131125	32900	-116325	32900
-116325	32900	-116325	24300
-116325	24300	-87626	24300
-87626	20650	-87626	24300
-87626	20650	-36759	20650
-36759	20650	-36759	124150
-36759	71750	-20299	71750
-20299	71750	-20299	95908
-36759	95908	-20299	95908
-34450	124150	-34450	127850
-34450	127850	-27076	127850
-19879	127850	-10285	127850
10382	127850	19847	127850
32039	127850	35012	127850
-225900	115340	-225900	127600
-133050	32900	-133050	40000
-133050	40000	-124200	40000
-127600	32900	-127600	40000
-114000	34900	-114000	41700
-108200	27700	-108200	41700
-112200	27700	-104500	27700
-108200	31200	-102200	31200
-98100	104100	-86000	104100
-98100	111100	-86000	111100
-172750	21550	-172750	25750
-172750	25750	-163000	25750
-150919	19920	-136081	19920
-150919	19920	-150919	25000
-136081	19920	-136081	25000
-78100	27650	-64100	27650
-78100	27650	-78100	115523
-78100	118305	-78100	127850
-78100	40250	-67143	40250
-67143	27650	-67143	43750
-78100	32600	-67143	32600
-72600	27650	-72600	40250
-78100	43750	-64100	43750
-78100	49850	-64100	49850
-74400	43650	-74400	49850
-67143	49850	-67143	67437
-78100	67437	-64100	67437
-78100	76500	-64100	76500
-74500	67437	-74500	76500
-67143	76500	-67143	90885
-78100	90885	-64100	90885
-78100	96850	-64100	96850
-67143	96850	-67143	118487
-78100	118487	-64100	118487
-78100	115400	-73800	115400
-74500	90885	-74500	96850
-78100	124500	-78300	124500
-134300	71750	-134300	73400
-131384	24300	-115500	24300
-124025	33106	-124025	41700
-116125	33200	-116125	38100
-115900	37083	-113850	37083
-133050	61800	-130500	61800
-133050	57300	-130500	57300
-130500	57300	-130500	61800
-90700	103900	-90700	111600
-95700	111700	-95700	114900
-110600	108319	-100277	108319
-100277	108319	-100277	111600
-110600	108319	-110600	114900
-91000	114800	-91000	126839
-111875	124700	-110100	124700
-100242	111400	-98200	111400
-73800	115400	-73800	118150
-78100	89700	-73250	89700
-73250	89700	-73250	90850
-87626	24506	-85700	24506
-133406	33160	-131300	33160
-78120	20650	-78120	27692
-75402	20650	-75402	27692
-71411	20650	-71411	27692
-78020	24633	-71501	24633
-74300	118200	-74300	124400
-248999	127770	-131950	127770
36959	20850	97100	20850
19820	71800	36959	71800
19820	71800	19820	95497
19820	95497	36959	95497
36959	20850	36959	124500
97100	20850	97100	48450
97100	25800	163000	25800
136041	20750	151039	20750
136041	20750	136041	25800
151039	20750	151039	25800
163000	25800	173154	25800
173154	21350	173154	25800
163000	21350	173154	21350
163000	21350	163000	25800
165800	21350	165800	25800
170100	21350	170100	25800
173154	24500	222800	24500
222800	24500	222800	34800
74500	118650	74500	124500
64000	118650	78000	118650
66207	96600	66207	118550
64000	96600	78000	96600
74500	90850	74500	96600
-153132	41590	-145614	41590
-145614	41590	-145614	48937
-225900	97396	-225900	109274
-225900	91330	-225900	56101
-225900	23300	-225900	48530
-224602	-13318	-224602	13710
-225900	-58000	-225900	-47000
-225900	-39056	-225900	-23300
-225900	-137942	-225900	-104600
-225900	-149770	-225900	-145723
-223100	-24199	-211050	-24199
-223100	-34800	-223100	-24199
-225900	-34800	-223100	-34800
-78300	-104054	-67076	-104054
-78061	-161750	-66413	-161750
-96700	-161750	-85393	-161750
-78300	-137603	-73794	-137603
40150	-157500	58100	-157500
52400	-161750	52400	-157500
85807	-149100	116537	-149100
130256	-165950	130256	-149100
206797	-149100	249000	-149100
226091	-131945	226091	-119806
226091	-112912	226091	-96286
226091	-90409	226091	-54388
226091	-48700	226091	38858
222800	34800	226091	34800
226091	46393	226091	59000
111875	127770	249000	127770
226091	124000	226091	127770
-78050	152950	-56950	152950
-131950	127770	-131950	152950
-130500	-165950	-130500	-149770
-248999	13710	-248999	127770
249000	13710	249000	127770
-248999	115340	-225900	115340
-248999	109274	-225900	109274
-248999	91330	-225900	91330
-248999	56101	-225900	56101
-248999	97396	-225900	97396
-248999	23300	-225900	23300
-248999	48530	-225900	48530
-236321	11228	-224602	11228
-236321	-11166	-236321	11228
-236321	-11166	-224602	-11166
-248999	-23300	-225900	-23300
-248999	-39056	-225900	-39056
-248999	-47000	-225900	-47000
-248999	-137942	-225900	-137942
-248999	-145723	-225900	-145723
226091	-137777	249000	-137777
226091	-131945	249000	-131945
226091	-119806	249000	-119806
226091	-96286	249000	-96286
226091	-112912	249000	-112912
226091	-90409	249000	-90409
226091	-54388	249000	-54388
226091	-48700	249000	-48700
226091	38858	249000	38858
226091	46393	249000	46393
226091	115585	249000	115585
226091	124000	249000	124000
-248999	107803	-241160	107803
-241160	99178	-241160	107803
-248999	99178	-241160	99178
-248999	35734	-241160	35734
-241160	28322	-241160	35734
-248999	28322	-241160	28322
-248999	-28247	-241160	-28247
-241160	-35873	-241160	-28247
-248999	-35873	-241160	-35873
-248999	-124181	-241160	-124181
-241160	-131789	-241160	-124181
-248999	-131789	-241160	-131789
241212	107806	249000	107806
241212	100144	241212	107806
241212	100144	249000	100144
241212	35839	249000	35839
241212	28111	241212	35839
241212	28111	249000	28111
241212	28111	249000	28111
241212	-28216	249000	-28216
241212	-35784	241212	-28216
241212	-35784	249000	-35784
241212	-100148	249000	-100148
241212	-107843	241212	-100148
241212	-107843	249000	-107843
-26874	83263	-26874	95908
-26874	83263	-20299	83263
19820	83263	26260	83263
26260	83263	26260	95497
201915	60200	204935	60200
201915	60200	201915	64000
204935	60200	204935	64000
201915	64000	204935	64000
201915	99850	201915	103650
201915	103650	204935	103650
201915	99850	204935	99850
204935	99850	204935	103650
-204935	-62500	-201915	-62500
-204935	-62500	-204935	-58700
-204935	-58700	-201915	-58700
-201915	-62500	-201915	-58700
-216500	-104600	-200200	-104600
-200200	-104600	-200200	-62500
-64100	20650	-64100	27650
-64100	43750	-64100	49850
-64100	67437	-64100	76500
-64100	90885	-64100	96850
-64100	118487	-64100	124500
64000	118650	64000	124500
64000	90850	64000	96600
64000	67500	64000	76190
64000	43950	64000	49600
64000	20850	64000	27600
-64100	-27960	-64100	-21110
-64100	-49964	-64100	-43920
-64100	-75052	-64100	-65913
-64100	-95276	-64100	-89221
-64100	-118919	-64100	-112871
-64100	-146500	-64100	-140303
64000	-146080	64000	-140550
64000	-118599	64000	-112850
64000	-95099	64000	-89350
64000	-74749	64000	-65850
64000	-49599	64000	-44000
64000	-27599	64000	-20650
-104504	-152800	-104504	-148628
-104504	-148628	-96700	-148628
-37700	136980	-34450	136980
-38502	147007	-26467	147007
-38502	147007	-38502	151808
-26467	147007	-26467	151808
-38502	151808	-26467	151808
26517	152950	47396	152950
26517	147550	26517	152950
-280000	13710	-248999	13710
-280000	-13318	-248999	-13318
-280000	-13318	-280000	13710
-248999	-149770	-248999	-13318
249000	13710	280000	13710
249000	-13318	280000	-13318
280000	-13318	280000	13710
249000	-149100	249000	-13318
-220976	105400	-220976	109074
-225900	105400	-220976	105400
-225900	109074	-220976	109074
198450	-149100	130256	-149100
-10315	-150059	10315	-150059
109700	-165950	130256	-165950
-131950	152602	-108000	152602
78161	152764	85354	152764
-130500	-165950	-109700	-165950
-85400	152602	-78050	152602
-56950	152602	-38502	152602
-27076	127850	-19879	127850
-10285	127850	10382	127850
19847	127850	32039	127850
47396	152950	56950	152950
108000	152950	113951	152950
-31986	-150059	-19932	-150059
19871	-150059	27100	-150059
-85393	-161750	-78061	-161750
-66413	-161750	-59040	-161750
-44250	-161750	-40150	-161750
37750	-161750	44250	-161750
198582	-149100	206797	-149100
